# Supplementary material for: Phasor-Based Endogenous NAD(P)H Fluorescence Lifetime Imaging Unravels Specific Enzymatic Activity of Neutrophil Granulocytes Preceding NETosis
Source: MDPI journal article supplement (doi:10.3390/ijms19041018), 2018-03-29

only pHrodo in RPMI

intensity

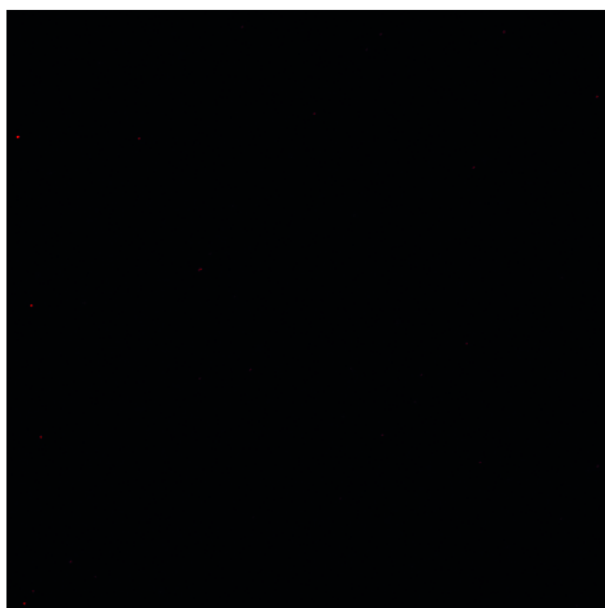

lifetime

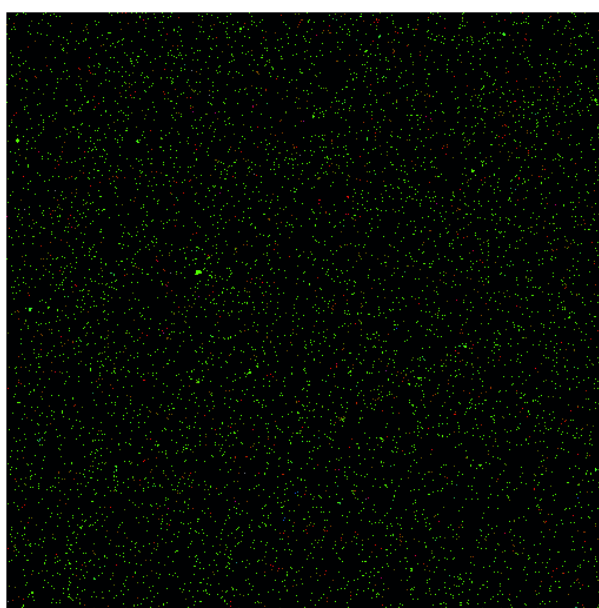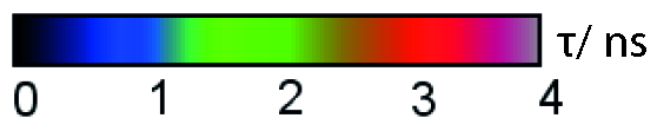

Supplement: s1 [file s1]
